# Supplementary material for: A Conditioned Behavioral Paradigm for Assessing Onset and Lasting Tinnitus in Rats
Source: PLoS One. 2016 Nov 11;11(11):e0166346. doi: 10.1371/journal.pone.0166346 (PMC5105995; doi:10.1371/journal.pone.0166346)
Supplement: S3 Fig — (XLSX) [file pone.0166346.s003.xlsx]

## Sheet: Fig. 2A - 6-8K
									CI01	CI02	CI03	CI04	CI05	CI06	CI07	CI08	CI09	CI10	CI11	CI12	CI13	CI14	CI15	CI16	CI17	CI18	CI19	CI20	CI21	DS17	DS18	DS19	DS20	DS21	DS22	DS23	DS24	CI22
									0.666667	0.166667	0.142857	0.25	0.166667	0.2	0	0	0.625	0.125	0.0833333	0.111111	0.5	0.444444	0.111111	0.125	0.125	0.625	0.4	0.444444	0.272727	0.6	0.75	0	0.25	0.375	0.125	0.5	0.625	0.4	11
									0	0.454545	0	0.2	0.125	0.1	0	0	0.333333	0.125	0.2	0.75	0.454545	0.25	0.1	0	0.333333	0.5	0.125	0.2	0.777778	0.25	0.2	0.1	0.375	0.5	0.666667	0.333333	0.428571	0.222222	12
									0.2	0.25	0.1	0.2	0	0.1	0	0.125	0.428571	0.25	0	0.727273	0.142857	0.166667	0.142857	0.222222	0	1	0.75	0	0.2	0.7	0.7	0.111111	0.444444	0.25	0.111111	0.444444	0.4	1	13
									0.166667	0	0.333333	0	0.333333	0.2	0.1	0.125	0.2	0.25	0.181818	0.857143	0	0.25	0.166667	0.375	0	0.428571	0.222222	0.5	0.111111	0.428571	0.5	0.111111	0.5	0.222222	0.4	0.444444	0.75	0.166667	14
									0.5	0.3	0	0	0.333333	0.125	0	0	0	0.25	0	0.6	0.777778	0.2	0.2	0.333333	0.2	0.125	0.444444	0.3	0.222222	0.111111	0.333333	0.2	0	0.25	0.333333	0.222222	0.833333	0.125	15
									0.2	0.428571	0	0.222222	0.3	0.1	0.1	0.125	0	0.166667	0	0.3	0	0.1	0	0.444444	0.454545	0.5	0	0.6	0.3	0.181818	0.1	0.444444	0	0.428571	0	0	0.4	0.222222	16

## Sheet: Fig. 2B - 10-12K
									CI01	CI02	CI03	CI04	CI05	CI06	CI07	CI08	CI09	CI10	CI11	CI12	CI13	CI14	CI15	CI16	CI17	CI18	CI19	CI20	CI21	DS17	DS18	DS19	DS20	DS21	DS22	DS23	DS24	CI22
									0.125	0	0	0.125	0	0.285714	0	0.111111	0.25	0	0.25	0.666667	0.25	0.9	0.888889	0.3	0.5	0.666667	0.4	1.16667	1.36364	0.8	0.571429	0.125	1.14286	0.5	0.142857	0.625	1	0.7	11
									0.111111	0.333333	0.125	0.777778	0.333333	0.333333	0.333333	0.111111	0.375	0.333333	0.111111	0.111111	0.444444	0.5	0.1	0.3	0.166667	0.428571	0.1	0.3	0.25	0.75	0.3	0.1	0.25	0.333333	0.5	0.5	0.5	0.571429	12
									0.666667	0	0	0.444444	0.285714	0.2	0.111111	0.125	0.375	0.125	0	0.222222	0.5	0.285714	0.1	0.428571	0.125	0.428571	0	0	0.375	0	0.1	0.3	0.2	0.75	0.444444	1	0.4	0.888889	13
									0.333333	0	0	0.4	0.142857	0.1	0.2	0.222222	0.125	0.222222	0.142857	0.25	0.125	0	0.166667	0.555556	0	0.375	0.1	0.285714	0.222222	0.1	0.1	0.2	0.571429	0.25	0.7	0.1	0.125	0.5	14
									0.222222	0.4	0	0	0.333333	0.125	0.1	0.1	0.111111	0	0.3	0	0.5	0.1	0.125	0.9	0.333333	0.25	0.2	1	0.125	0.375	0.444444	0.4	0.333333	0.142857	0.2	0.142857	0.125	0.142857	15
									0.1	0.555556	0.125	0	0.3	0.2	0.2	0.2	0.111111	0	0	0.125	0.2	0.333333	0.5	0.333333	0.222222	0.166667	0.1	0.1	0.333333	0.25	0.444444	0.222222	0.285714	0.2	0.333333	0.333333	0.25	0.222222	16

## Sheet: Fig. 2C - 14-16K
									CI01	CI02	CI03	CI04	CI05	CI06	CI07	CI08	CI09	CI10	CI11	CI12	CI13	CI14	CI15	CI16	CI17	CI18	CI19	CI20	CI21	DS17	DS18	DS19	DS20	DS21	DS22	DS23	DS24	CI22
									0.333333	0.25	0	0.125	0.777778	0	0.142857	0.111111	0.428571	0.428571	0.444444	0.222222	0.6	0.625	0	0.444444	1.33333	0.75	0.1	0.142857	0.125	0.1	0	0.1	0.4	0.2	0.1	0.166667	0.2	0	11
									0.5	0.125	0.4	0.1	0.333333	0.111111	0.125	0.1	0.25	0.375	0	0	0.375	0.25	0.444444	0.3	0	0.333333	0.2	0.3	0	0.25	0.8	0.3	0.333333	1	0.111111	0.5	0.2	0.4	12
									0.111111	0	0.3	0.142857	0.166667	0.25	0.111111	0	0.1	0.142857	0	0.333333	0	0	0.0909091	0.1	0	0.375	0	0	1	0.1	0.3	0.2	0.222222	0.1	0.125	0.2	0.2	0.625	13
									0.25	0	0	0.166667	0.333333	0.1	0	0	0.125	0.125	0.5	0.2	0.1	0	0.333333	0.625	0.1	0.888889	0	0	0.6	0.3	0.222222	0	0.25	0.5	0.3	0.333333	0.222222	0.5	14
									0.333333	0.333333	0	0.2	0	0.25	0	0.1	0.222222	0.333333	0.1	0.222222	0.125	0.2	0.2	0.3	0.333333	0.625	0.222222	0.111111	0.5	0.111111	0.0909091	0.1	0.4	0.111111	0.2	0.25	0.333333	0.5	15
									0.111111	0.25	0	0.1	0	0	0	0	0.1	0.2	0.25	0.2	0.125	0	0	0.125	0.25	0.428571	0.2	0.4	0.285714	0.1	0.2	0	0.111111	0.2	0.1	0.166667	0.2	0.375	16

## Sheet: Fig. 2D - 22-24K
									CI01	CI02	CI03	CI04	CI05	CI06	CI07	CI08	CI09	CI10	CI11	CI12	CI13	CI14	CI15	CI16	CI17	CI18	CI19	CI20	CI21	DS17	DS18	DS19	DS20	DS21	DS22	DS23	DS24	CI22
									0.555556	0.333333	0.166667	0.2	0.75	0.222222	0.4	0	0.5	0.666667	0.375	0.428571	0.444444	0.375	0.625	0.166667	1.4	0.5	0.3	0.833333	0.285714	0.375	1.14286	0.285714	1.16667	1	0.428571	1.33333	0.5	0.4	11
									0.2	0.142857	0.375	0.2	0.75	0.4	0.285714	0.444444	0.222222	0	0	0.2	0.25	0	0	0.363636	0.25	0.666667	0	0.222222	0.4	0.333333	0.4	0.444444	0.2	0.3	0.333333	0.555556	0.363636	0.5	12
									0.428571	0	0.3	0.4	0.571429	0	0.166667	0	0.2	0.5	0	0.25	0	0	0.3	0.2	0	0.125	0.142857	0.166667	0	0.375	0.222222	0.1	0.5	0.25	0.222222	0.428571	0.285714	0.25	13
									0	0.166667	0	1	0	0.1	0.1	0	0.222222	0.25	0.555556	0.555556	0	0	0.375	0.25	0	0.8	0.142857	0.625	0.7	0.142857	0.125	0.1	0.125	0.375	0.222222	0.2	0.125	1	14
									0.125	0.333333	0	0.285714	0.222222	0.125	0.2	0.0909091	0.111111	0.1	0	0.5	0	0	0.2	0.5	0.333333	0.5	0	0.5	0	0.3	0.1	0.111111	0.166667	0.125	0.142857	0.4	0.444444	0.375	15
									0.222222	0.75	0.375	0.444444	0.375	0	0	0.125	0.4	0.222222	0.25	0.3	0.666667	0.1	0	0.222222	0	0.428571	0.222222	0.375	0.428571	0.444444	0.25	0.272727	0.285714	0.375	0.625	0.428571	0.375	0.333333	16

## Sheet: Fig. 2E - 30-32K
									CI01	CI02	CI03	CI04	CI05	CI06	CI07	CI08	CI09	CI10	CI11	CI12	CI13	CI14	CI15	CI16	CI17	CI18	CI19	CI20	CI21	DS17	DS18	DS19	DS20	DS21	DS22	DS23	DS24	CI22
									0.555556	0.333333	0.166667	0.2	0.75	0.222222	0.4	0	0.5	0.666667	0.375	0.428571	0.444444	0.375	0.625	0.166667	1.4	0.5	0.3	0.833333	0.285714	0.2	0.333333	0.375	0.25	0.25	0.375	0.2	0.5	0.4	11
									0.2	0.142857	0.375	0.2	0.75	0.4	0.285714	0.444444	0.222222	0	0	0.2	0.25	0	0	0.363636	0.25	0.666667	0	0.222222	0.4	0.222222	0.111111	0.2	0.2	0.8	0.111111	0.25	0.25	0.5	12
									0.428571	0	0.3	0.4	0.571429	0	0.166667	0	0.2	0.5	0	0.25	0	0	0.3	0.2	0	0.125	0.142857	0.166667	0	0.25	0.166667	0.1	0.5	0.4	0.222222	0.25	0.166667	0.25	13
									0	0.166667	0	1	0	0.1	0.1	0	0.222222	0.25	0.555556	0.555556	0	0	0.375	0.25	0	0.8	0.142857	0.625	0.7	0.142857	0.444444	0.5	0.428571	0.142857	0.444444	0.5	0.285714	1	14
									0.125	0.333333	0	0.285714	0.222222	0.125	0.2	0.0909091	0.111111	0.1	0	0.5	0	0	0.2	0.5	0.333333	0.5	0	0.5	0	0.5	0.2	0.1	0.285714	0.333333	0.4	0.25	0.1	0.375	15
									0.222222	0.75	0.375	0.444444	0.375	0	0	0.125	0.4	0.222222	0.25	0.3	0.666667	0.1	0	0.222222	0	0.428571	0.222222	0.375	0.428571	0.5	0.444444	0.111111	0	0.125	0	0.333333	0.375	0.333333	16
