# Supplementary material for: A Conditioned Behavioral Paradigm for Assessing Onset and Lasting Tinnitus in Rats
Source: PLoS One. 2016 Nov 11;11(11):e0166346. doi: 10.1371/journal.pone.0166346 (PMC5105995; doi:10.1371/journal.pone.0166346)
Supplement: S8 Fig — (XLSX) [file pone.0166346.s008.xlsx]

## Sheet: Left  Ear data
	LEFT	Click		8k	12k	16k	24k	32k					Click		8k	12k	16k	24k	32k					Click		8k	12k	16k	24k	32k
AVG	Tinn(+) Baseline	5		16.3636	15.9091	17.7273	20.9091	21.3636			AVG	Tinn(-) Baseline	5		16.3636	16.3636	18.6364	18.6364	21.8182			AVG	Ctrl base	5		16.875	16.25	15.625	18.75	19.375
AVG	Tinn(+) PED0	5		33.6364	43.6364	44.0909	50	44.0909			AVG	Tinn(-) PED0	5		35	41.8182	44.0909	47.2727	43.1818			AVG	Ctrl ped0	5		16.25	18.125	16.25	20	21.875
AVG	Tinn(+) Post Wk 7	5		15.9091	17.2727	18.6364	19.5455	22.7273			AVG	Tinn(-) Post Wk 7	5		18.6364	18.6364	19.5455	20.9091	20.9091			AVG	Ctrl pew7	5		16.875	18.75	16.875	20.625	21.875
SEM	Tinn(+) Baseline	0		1.18531	1.13181	1.56141	1.13181	1.18531			SEM	Tinn(-) Baseline	0		0.974891	1.36364	1.18531	1.91773	1.01639			SEM	Ctrl base	0		1.31526	1.25	1.13291	1.56696	1.13291
SEM	Tinn(+) PED0	0		3.1688	4.26886	4.09091	3.63068	2.8459			SEM	Tinn(-) PED0	0		4.0452	3.64771	3.8623	4.54091	3.52089			SEM	Ctrl ped0	0		1.25	1.6195	1.56696	1.33631	1.31526
SEM	Tinn(+) Post Wk 7	0		1.3174	1.56141	1.18531	1.84077	0.787296			SEM	Tinn(-) Post Wk 7	0		1.66391	1.5212	1.71286	0.909091	0.609837			SEM	Ctrl pew7	0		0.914906	1.25	1.31526	1.47524	1.6195

## Sheet: Right Ear data
	RIGHT	Click		8k	12k	16k	24k	32k					Click		8k	12k	16k	24k	32k					Click		8k	12k	16k	24k	32k
AVG	Tinn(+) Baseline	5		19.5455	19.5455	17.2727	20	22.7273			AVG	Tinn(-) Baseline	5		18.6364	18.6364	16.3636	19.0909	20.9091			AVG	Ctrl base	5		16.875	18.75	17.5	21.25	23.75
AVG	Tinn(+) PED0	5		32.2727	43.6364	43.1818	50.4545	44.0909			AVG	Tinn(-) PED0	5.45455		33.6364	44.5455	45	48.6364	42.2727			AVG	Ctrl ped0	5		15.625	17.5	18.125	20.625	23.125
AVG	Tinn(+) Post Wk 7	5		18.1818	19.5455	16.3636	20.4545	19.5455			AVG	Tinn(-) Post Wk 7	5		20.9091	18.6364	18.6364	21.3636	21.3636			AVG	Ctrl pew7	5		16.875	18.125	18.75	21.25	21.875
SEM	Tinn(+) Baseline	0		1.96035	1.05627	1.70075	1.78377	1.56141			SEM	Tinn(-) Baseline	0		1.36364	1.5212	1.36364	1.62623	1.13181			SEM	Ctrl base	0		1.31526	1.25	1.88982	1.56696	1.25
SEM	Tinn(+) PED0	0		2.27273	3.69834	3.94696	3.40151	2.8459			SEM	Tinn(-) PED0	0.454545		4.32177	5.11035	5.60032	4.47675	3.46172			SEM	Ctrl ped0	0		0.625	1.33631	1.6195	1.47524	0.914906
SEM	Tinn(+) Post Wk 7	0		1.93916	2.07305	1.79531	2.2818	2.2818			SEM	Tinn(-) Post Wk 7	0		1.47989	1.66391	1.36364	1.18531	1.36364			SEM	Ctrl pew7	0		0.914906	1.31526	1.25	0.818317	1.31526

## Sheet: Fig 7. A-B
														Group
														Frequency
														Time
														Ear
														mixed model with repeated measures
														problem - likely to get interaction
														if we find significant interaction, change to separate analysis by freq where we group across time
														within mixed model, can do sub-analysis
														maybe more reliable to do separate analyses by frequency
														Fixed or random factor
														Fixed factor - things like sex (m or f)
														Random factor - sampling tissue multiple times from someone's skin
															Locations would very, you can't generalize between one animal and another
														Find averages for each band for each rat
														Using those data points, do our stats
